# Supplementary material for: Presence of unique glyoxalase III proteins in plants indicates the existence of shorter route for methylglyoxal detoxification
Source: PubMed Central journal article supplement (PMC4702089; doi:10.1038/srep18358), 2016-01-06
Supplement: srep18358-s1.pdf [file srep18358-s1.pdf]

**Presence of unique glyoxalase III proteins in plants indicates the existence of shorter route for methylglyoxal detoxification**

**Ajit Ghosh<sup>1,3</sup>, Hemant R Kushwaha<sup>1</sup>, Mohammad R Hasan<sup>1</sup>, Ashwani Pareek<sup>2</sup>, Sudhir K Sopory<sup>1</sup>,  
Sneh L Singla-Pareek<sup>1\*</sup>**

<sup>1</sup>Plant Molecular Biology, International Centre for Genetic Engineering and Biotechnology, Aruna Asaf Ali Marg, New Delhi-110067, India, <sup>2</sup>Stress Physiology and Molecular Biology Laboratory, School of Life Sciences, Jawaharlal Nehru University, New Delhi-110067, India, and <sup>3</sup>Present address: Department of Biochemistry and Molecular Biology, Shahjalal University of Science and Technology, Sylhet-3114, Bangladesh.

\*To whom correspondence should be addressed:

Sneh L Singla-Pareek, Plant Molecular Biology Group, International Centre for Genetic Engineering and Biotechnology, Aruna Asaf Ali Marg, New Delhi-110067, India.

Phone: +91-11-26741358, Ext. 363 (O);

Fax: +91-11-26742316;

E-mail: [sneh@icgeb.res.in](mailto:sneh@icgeb.res.in)

**Table S1** | Comparison of enzyme kinetic parameters of WT OsDJ-1C protein and its mutein C119A

| Sl. no | Parameter                                                   | WT   | C119A | Deviation from WT (%) |
|--------|-------------------------------------------------------------|------|-------|-----------------------|
| 1      | $K_m$ ( $\mu\text{M}$ )                                     | 744  | 602   | 19                    |
| 2      | $V_{\text{max}}$ ( $\mu\text{mol min}^{-1}\text{mg}^{-1}$ ) | 58   | 22    | 62                    |
| 3      | $k_{\text{cat}}$ ( $\text{min}^{-1}$ )                      | 2500 | 945   | 62                    |
| 4      | $k_{\text{cat}}/K_m$ ( $\text{mM}^{-1}\text{min}^{-1}$ )    | 3359 | 1569  | 53                    |

**Table S2** | List of single domain containing DJ-1 proteins in plants used in this study

| Sl. No. | Name of Species                        | Classification         | Swiss-prot Ids                                 |
|---------|----------------------------------------|------------------------|------------------------------------------------|
| 1       | <i>Oryza sativa subsp. japonica</i>    | Monocot                | A3BCD1, B9G8C7                                 |
| 2       | <i>Hordeum vulgare var. distichum</i>  | Monocot                | F2D1P7, F2EG99, M0V2D0, M0WAD7, M0XZ96, M0YG87 |
| 3       | <i>Triticum urartu</i>                 | Monocot                | M7Y5X3                                         |
| 4       | <i>Triticum aestivum</i>               | Monocot                | W5CKN3, W5CV43, W5DFB7, W5H8W7                 |
| 5       | <i>Zea mays</i>                        | Monocot                | K7VDN4, K7VH97                                 |
| 6       | <i>Sorghum bicolor</i>                 | Monocot                | C5YMA2                                         |
| 7       | <i>Arabidopsis thaliana</i>            | Dicot                  | B3H6C6, Q56ZE0, Q56ZU8                         |
| 8       | <i>Medicago truncatula</i>             | Dicot                  | B7FLB0                                         |
| 9       | <i>Ricinus communis</i>                | Dicot                  | B9TFX6                                         |
| 10      | <i>Vitis vinifera</i>                  | Dicot                  | F6I594                                         |
| 11      | <i>Glycine max</i>                     | Dicot                  | K7K833                                         |
| 12      | <i>Brassica rapa subsp. pekinensis</i> | Dicot                  | Q8H6J5                                         |
| 13      | <i>Phaseolus vulgaris</i>              | Dicot                  | V7CEB9                                         |
| 14      | <i>Populus trichocarpa</i>             | Dicot                  | U7DVP5                                         |
| 15      | <i>Genlisea aurea</i>                  | Angiosperms (Eudicots) | S8CKY5                                         |

**Table S3** | List of *DJ-1* genes in *Arabidopsis*, along with their chromosomal locations, alternative spliced forms, CDS, polypeptide length, molecular weight, and localization (bp base pair, aa amino acid, Da daltons)

| Swiss-<br>prot ID | Gene           | Protein   | Chrom<br>osome<br>no. | Locus       | CDS<br>(bp) | Polypeptide<br>length (aa) | Mol.<br>Mass<br>(Da) | pI   | Localization                                                        |
|-------------------|----------------|-----------|-----------------------|-------------|-------------|----------------------------|----------------------|------|---------------------------------------------------------------------|
| Q9MAH3            | <i>AtDJ-1b</i> | AtDJ-1b   | 1                     | AT1G53280   | 1317        | 438                        | 46990.1              | 7.95 | Chloroplast                                                         |
| Q9ZV19            | <i>AtDJ-1e</i> | AtDJ-1e.1 | 2                     | AT2G38860.1 | 1170        | 389                        | 41668.1              | 5.01 | Cytoplasm                                                           |
|                   |                | AtDJ-1e.2 |                       | AT2G38860.2 | 1197        | 398                        | 42729.2              | 4.84 |                                                                     |
|                   |                | AtDJ-1e.3 |                       | AT2G38860.3 | 840         | 279                        | 30133.6              | 4.37 |                                                                     |
| Q9M8R4            | <i>AtDJ-1d</i> | AtDJ-1d   | 3                     | AT3G02720   | 1167        | 388                        | 41645.3              | 5.08 | Cytoplasm                                                           |
| Q9FPF0            | <i>AtDJ-1a</i> | AtDJ-1a.1 | 3                     | AT3G14990.1 | 1179        | 392                        | 41856.9              | 5.08 | Vacuole, Plasma<br>membrane, Chloroplast,<br>Plasmodesmata, Cytosol |
|                   |                | AtDJ-1a.2 |                       | AT3G14990.2 | 1110        | 369                        | 39478.1              | 5.07 |                                                                     |
|                   |                | AtDJ-1a.3 |                       | AT3G14990.3 | 1110        | 369                        | 39478.1              | 5.07 |                                                                     |
| Q9MIG8            | <i>AtDJ-1f</i> | AtDJ-1f   | 3                     | AT3G54600   | 1200        | 399                        | 43141.7              | 5.65 | Cytosol                                                             |
| Q56ZU8            | <i>AtDJ-1c</i> | AtDJ-1c.1 | 4                     | AT4G34020.1 | 1419        | 472                        | 50986.1              | 8.99 | Chloroplast                                                         |
|                   |                | AtDJ-1c.2 |                       | AT4G34020.2 | 1314        | 437                        | 47336.0              | 9.07 |                                                                     |

**Table S4** | Comparison of enzyme kinetics of conventional GLY I/II enzymes with the novel GLY III enzymes from various species

| Species             | Protein     | $K_m$<br>( $\mu\text{M}$ ) | $k_{\text{cat}}$<br>( $\text{s}^{-1}$ ) | $k_{\text{cat}}/K_m$<br>( $\text{M}^{-1}\text{s}^{-1}$ ) | Reference     |
|---------------------|-------------|----------------------------|-----------------------------------------|----------------------------------------------------------|---------------|
| <i>Oryza sativa</i> | OsGLYI-11.2 | 100                        | 70.96                                   | $7.1 \times 10^5$                                        | 1             |
|                     | OsGLYII-2   | 254                        | 508                                     | $2.0 \times 10^6$                                        | 2             |
|                     | OsDJ-1C     | 744                        | 41.66                                   | $5.6 \times 10^4$                                        | Present study |
| <i>E. coli</i>      | EcGLYI      | 27                         | 338                                     | $1.2 \times 10^7$                                        | 3             |
|                     | EcGLYII     | 184                        | 53                                      | $4.7 \times 10^5$                                        | 4             |
|                     | EcGLY III   | 1430                       | 2.62                                    | $0.1 \times 10^4$                                        | 5             |
| <i>Homo sapiens</i> | HsGLYI      | 66                         | 500                                     | $2.3 \times 10^7$                                        | 6             |
|                     | HsGLYII     | 187                        | 780                                     | $4.2 \times 10^6$                                        | 7             |
|                     | HsDJ-1      | 600                        | 1.21                                    | $0.2 \times 10^4$                                        | 8             |

**Table S5** | List of primer pairs and their sequence used for qRT-PCR analysis and site directed mutagenesis

| Sl. no | Gene name                       | Primer name | Sequence (5'-3')           | Product size |
|--------|---------------------------------|-------------|----------------------------|--------------|
| 1      | <i>OsDJ-1A</i>                  | DJ-1A_for1  | ATGCAGATGTGTGATCTGTGA      | 147          |
|        |                                 | DJ-1A_rev1  | TCCATCAATCAATCCATCAGCTA    |              |
| 2      | <i>OsDJ-1B</i>                  | DJ-1B_for2  | GCCTGTCACCTGTGAGTGAT       | 177          |
|        |                                 | DJ-1B_rev2  | AGACAGCGTAAACTCACCGA       |              |
| 3      | <i>OsDJ-1C</i>                  | DJ-1C_for1  | CACAGCTTTGGGCTTTTCGTC      | 147          |
|        |                                 | DJ-1C_rev1  | CAGCTCCTTCTGCTCGTACA       |              |
| 4      | <i>OsDJ-1D</i>                  | DJ-1D_for1  | GCGGTTGAGAGACAGTGTGA       | 108          |
|        |                                 | DJ-1D_rev1  | CACGGCATGAGAACAACAGC       |              |
| 5      | <i>OsDJ-1E</i>                  | DJ-1E_for1  | TGAGGCATCCTTTTGCTCGT       | 147          |
|        |                                 | DJ-1E_rev1  | ACCCAAAGGTGCAATATCCATC     |              |
| 6      | <i>OsDJ-1F</i>                  | DJ-1F_for1  | CTCGCCGAGTTCATCGCTC        | 99           |
|        |                                 | DJ-1F_rev2  | TGACAGAGAGAACAGAGAAGCA     |              |
| 7      | <i>eEF-1<math>\alpha</math></i> | eEF_for     | TTTCACTCTTGGTGTGAAGCAGAT   | 100          |
|        |                                 | eEF_rev     | GACTTCCTTCACGATTTTCATCGTAA |              |

#### References:

1. Mustafiz, A. *et al.* A unique Ni -dependent and methylglyoxal-inducible rice glyoxalase I possesses a single active site and functions in abiotic stress response. *Plant J.* **78**, 951-963 (2014).
2. Ghosh, A., Pareek, A., Sopory, S. K. & Singla-Pareek, S. L. A glutathione responsive rice glyoxalase II, OsGLYII-2, functions in salinity adaptation by maintaining better photosynthesis efficiency and anti-oxidant pool. *Plant J.* **80**, 93-105 (2014).
3. Clugston, S. L. *et al.* Overproduction and characterization of a dimeric non-zinc glyoxalase I from *Escherichia coli*: evidence for optimal activation by nickel ions. *Biochemistry* **37**, 8754-8763 (1998).
4. O'Young, J., Sukdeo, N. & Honek, J. *Escherichia coli* glyoxalase II is a binuclear zinc-dependent metalloenzyme. *Arch. Biochem. Biophys.* **459**, 20-26 (2007).
5. Subedi, K. P., Choi, D., Kim, I., Min, B. & Park, C. Hsp31 of *Escherichia coli* K-12 is glyoxalase III. *Mol. Microbiol.* **81**, 926-936 (2011).

6. Ridderstrom, M., Cameron, A. D., Jones, T. A. & Mannervik, B. Mutagenesis of residue 157 in the active site of human glyoxalase I. *Biochem. J.* **328**, 231-235 (1997).
7. Ridderstrom, M. *et al.* Molecular cloning, heterologous expression, and characterization of human glyoxalase II. *J. Biol. Chem.* **271**, 319-323 (1996).
8. Lee, J. Y. *et al.* Human DJ-1 and its homologs are novel glyoxalases. *Hum. Mol. Genet.* **21**, 3215-3225 (2012).

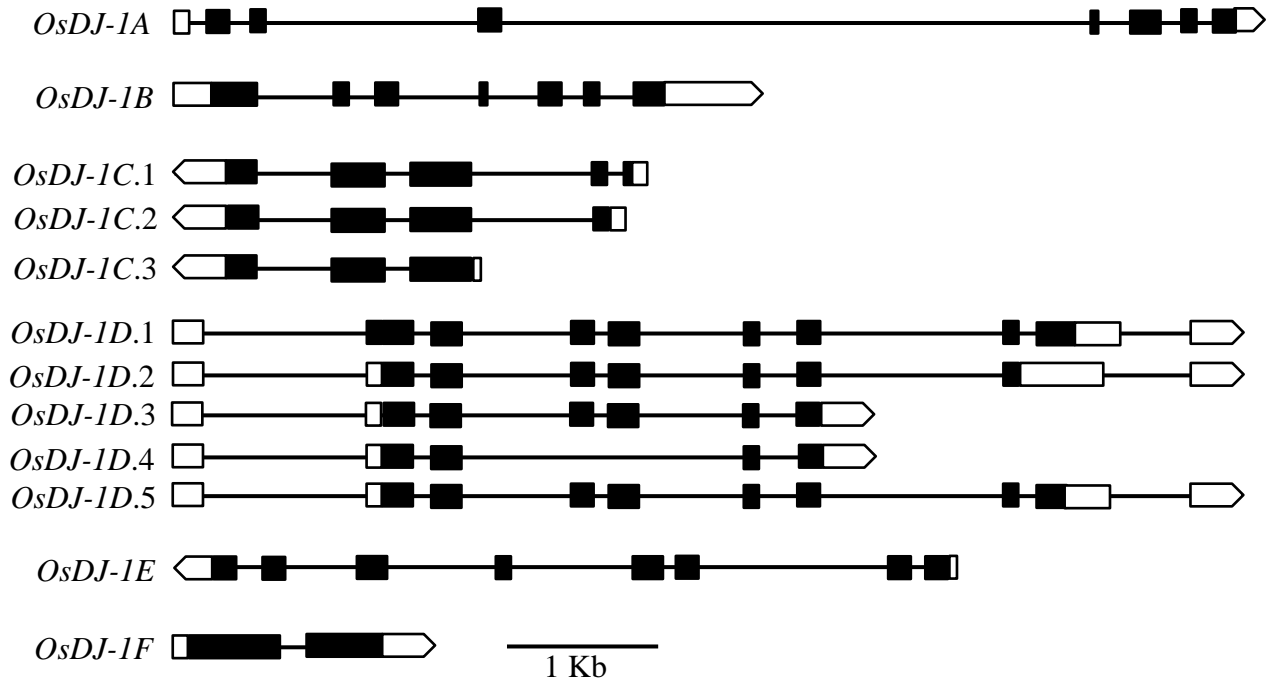

**Figure S1 | Gene structures of all the *DJ-1* family members of rice including alternative spliced forms.** All the exons are shown in filled black boxes and the introns are indicated by black lines. The 5'-UTR regions are shown using empty boxes and the 3'-UTR regions are shown in empty arrows that indicates the direction of the gene.



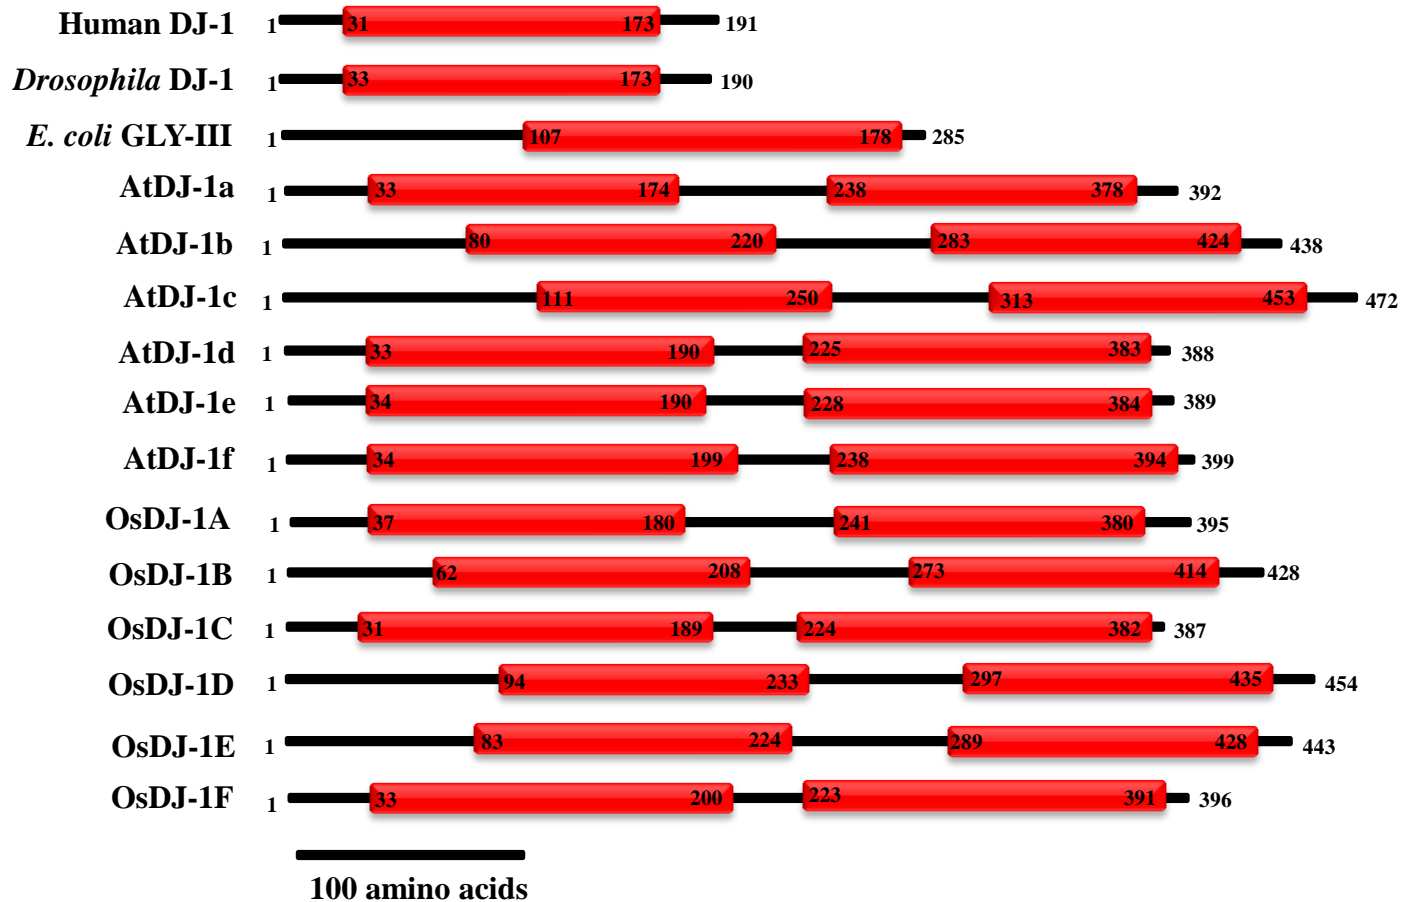

**Figure S2 | Domain architecture of various GLYIII/DJ-1 proteins.** All the *Arabidopsis* and rice DJ-1 proteins along with human, *Drosophila* and *E. coli* GLY-III proteins were analyzed for the presence of DJ-1 domain. All plant DJ-1 proteins possess two DJ-1 domains (represented by red box), whereas non-plant proteins possess only one DJ-1 domain. The length of full protein as well as domain(s) are indicated by exact amino acid numbers.

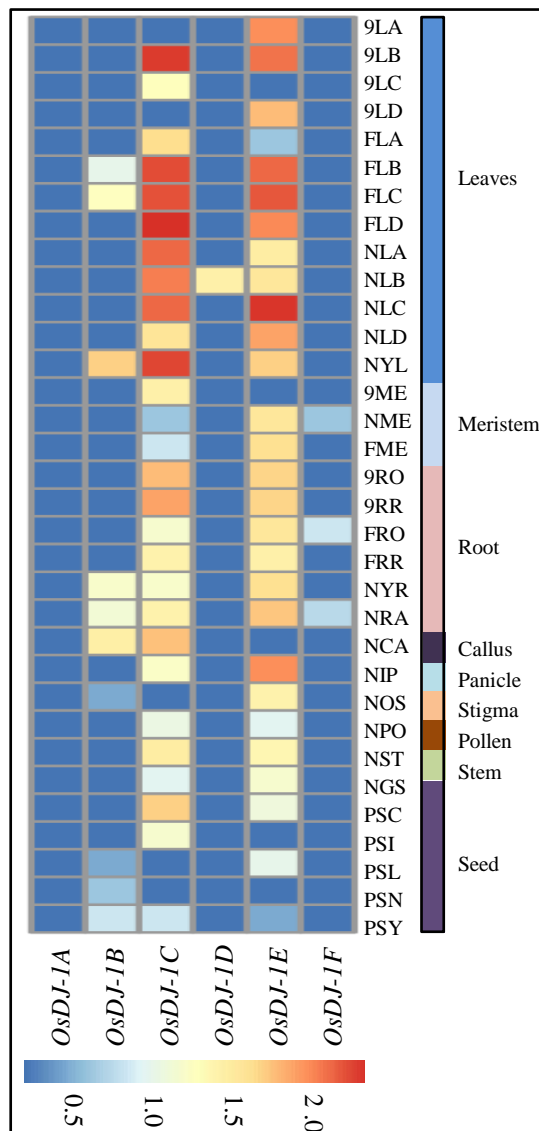

**Figure S3 | Expression profiling of *OsDJ-1* genes using MPSS data in different tissues of rice.** Heatmap has been generated using TIGR MeV software package and represent hierarchical clustering of average  $\log_2$  signal values. The color bar below represents relative expression values; thereby, red color represents highest expression levels, white represents medium expression levels, and blue signifies lowest expression levels.

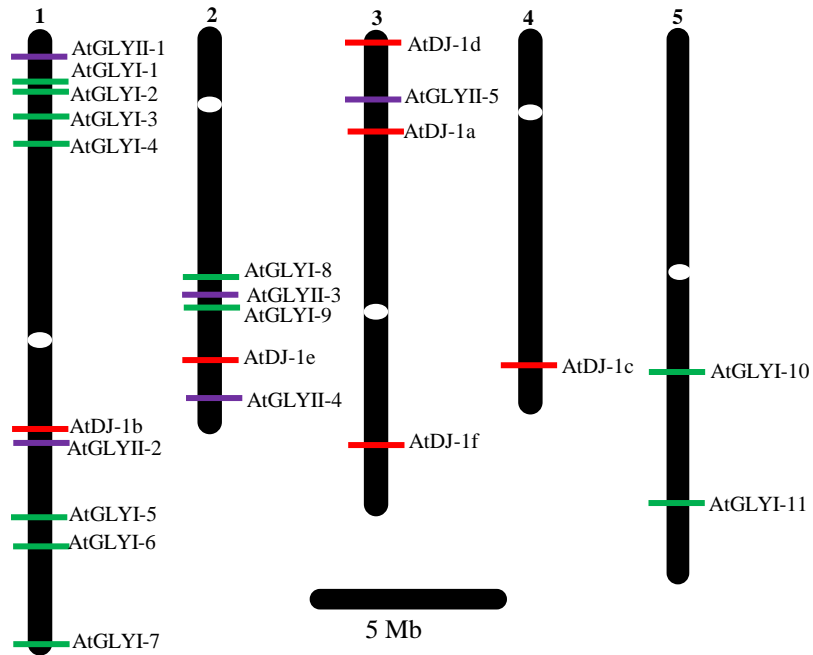

**Figure S4| Chromosomal distribution of glyoxalase genes (GLYI, GLYII and DJ-1) in *Arabidopsis*.** Chromosomes carrying glyoxalase genes are shown with their respective numbers at the top of the bar. Novel glyoxalase III (DJ-1) genes have been marked along with GLY I and GLY II genes. GLY I, GLY II and DJ-1 genes are marked with green, purple, and red colour boxes respectively.

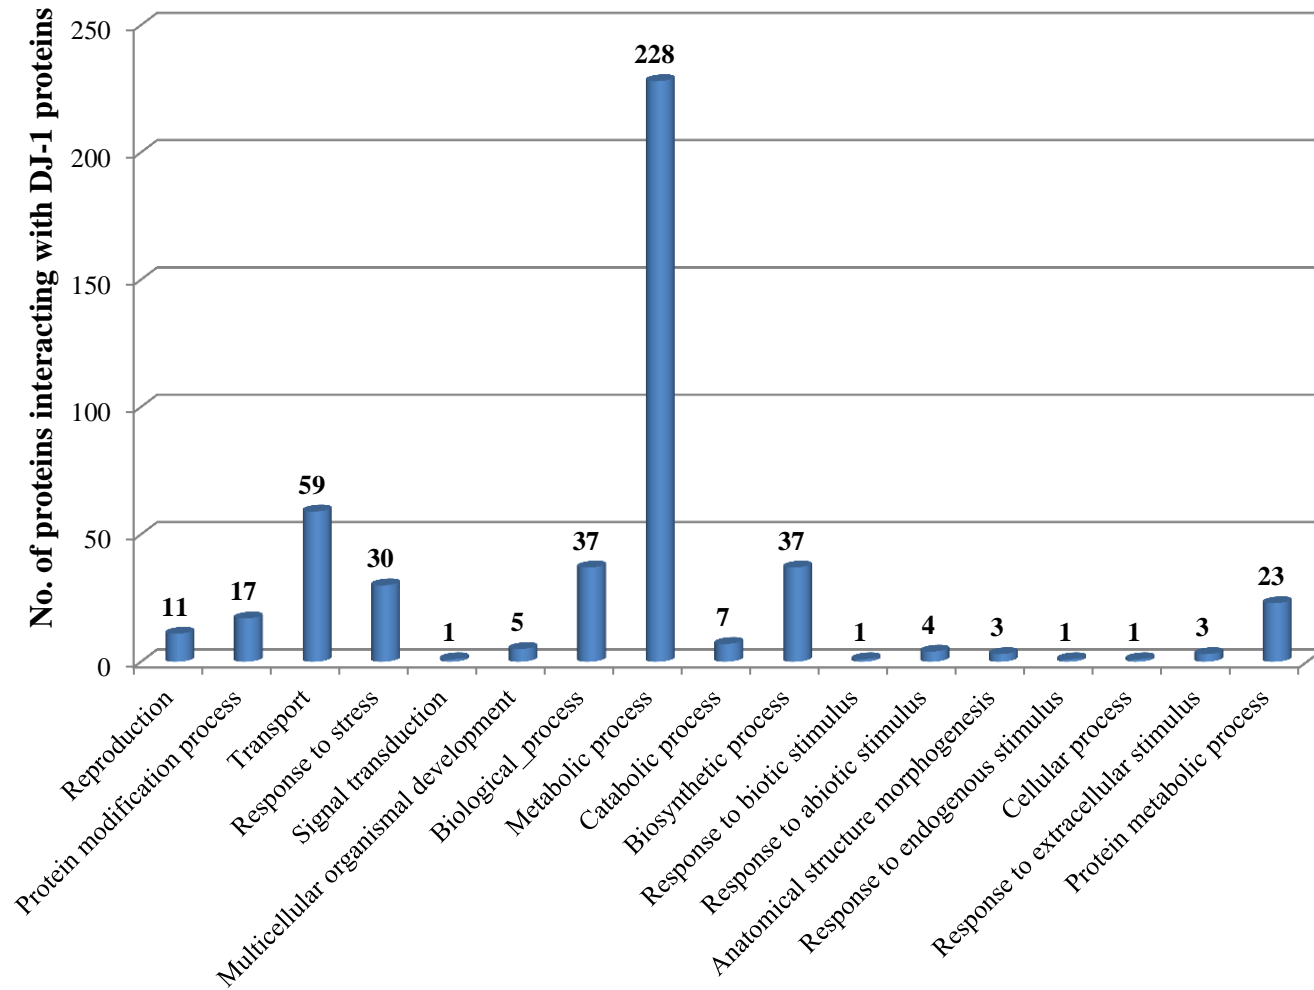

**Figure S5 | *In silico* prediction of proteins interacting with OsDJ-1 proteins in rice.**
